## SEQUENCE ANALYSIS

### MOTIF SCRAPER: A CROSS-PLATFORM, OPEN-SOURCE TOOL FOR IDENTIFYING DEGENERATE NUCLEOTIDE MOTIF MATCHES IN FASTA FILES

Elisha D.O. Roberson<sup>1,2,\*</sup>

<sup>1</sup>Washington University, Department of Medicine, Division of Rheumatology, St. Louis, MO 63110 USA

<sup>2</sup>Washington University, Department of Genetics, St. Louis, MO 63110 USA

\*To whom correspondence should be addressed.

#### Abstract

**Summary:** Many genomic features are defined not by exact sequence matches, but by degenerate nucleotide motifs that represent multiple compatible matches. While there are databases cataloging genomic features, such as the location of transcription factor motifs, for commonly used model species, identifying the locations of novel motifs, known motifs in non-model genomes, or known motifs in personal whole-genomes is difficult. I designed motif scraper to overcome this limitation, allowing for efficient, multiprocessor motif searches in any FASTA file.

**Availability and implementation:** The motif scraper package is available via [PyPI](#), and the Python source is available on GitHub at [https://github.com/RobersonLab/motif\\_scraper](https://github.com/RobersonLab/motif_scraper).

**Contact:** [eroberson@wustl.edu](mailto:eroberson@wustl.edu); [@thatdnaguy](https://twitter.com/thatdnaguy)

## A. Introduction

Genomic features can often be described by sequence motifs, rather than exact sequence matches. Particularly important examples of this property are proximal promoter elements that bind transcription factors, and proteins that bind at enhancers and insulators. In these cases, the binding protein does not find an exact sequence match, but rather binds a range of sequences with compatible charge profiles for the protein binding interface. Using methods such as ChIP-Seq, the binding sequences for these factors can be determined and represented as a sequence motif using IUPAC-approved degenerate nucleotide codes. Other important features are exact matches, such as the match between a microRNA (**miR**) and seed sequences in the 3' untranslated region (**UTR**) of a targeted gene. Many databases exist cataloging the location of transcription factor motifs (Kaplun, et al., 2016; Kel, et al., 2003; Knuppel, et al., 1994; Matys, et al., 2006; Wingender, 1988; Wingender, 2008; Wingender, et al., 1996), miRNA binding sites (Andres-Leon, et al., 2015; Dweep, et al., 2014; Griffiths-Jones, 2004; Griffiths-Jones, et al., 2006; Griffiths-Jones, et al., 2008; Kozomara and Griffiths-Jones, 2014; Lagana, et al., 2012; Prabahar and Natarajan, 2017), and genome-editing sites (Gratz, et al., 2014; Heigwer, et al., 2014; Liu, et al., 2015; Montague, et al., 2014; Naito, et al., 2015; Stemmer, et al., 2015; Xiao, et al., 2014). However, these databases are often restricted to commonly used model species. Newly sequenced species are likely never to be included, and model species may lag behind the release of new genome drafts. Furthermore, many individual, phased whole genomes are being generated. The databases of sequence motifs are designed relative to a reference sequence, rather than to personal genomes. Inspired by previous work to identify a specific subset of CRISPR/Cas9 sites (Roberson, 2015), my goal for motif scraper was to instead develop a more general purpose motif searching tool that would have broader use. Motif scraper fills this annotation gap by allowing for the specification degenerate sequence motifs and reporting the position and composition of all matches in a FASTA file, which could be a personal genome, a reference genome, or a set of genomic slices, such as all the 3' UTRs of protein coding genes.

## B. Methods

Motif scraper was designed in Python, and is compatible with both Python 2 and 3. The ability to read FASTA formatted files and generate FASTA indexes is provided by pyfaidx (Shirley, et al., 2015). Motifs are specified as a text string with using IUPAC degenerate bases, which are converted internally into a regular expression and compiled by the regex package. This allows for detection of overlapping motifs. One or more specific regions or a specific strand relative to the reference can be specified for targeted search. By default all contigs in the FASTA file are searched for both + and – strands. The multiprocessing Python package handles the use of multiple computer cores, searching each target region / strand separately. Each hit is reported with the contig, start position, end position, strand, sequence, and matching motif in the output file. The code is available under an MIT license, stored on GitHub, and distributed through the Python Package Index (PyPI). Compatibility with Python 2 and 3 is assessed with every repository commit using Travis CI service.

## C. Results

### C.1. Identification of mock transcription factor binding motifs

As a benchmark, I calculated a faux consensus sequence for two DNA binding proteins: CCAAT/Enhancer Binding Protein Beta (**CEBPB**) and CCCTC-Binding Factor (**CTCF**). I downloaded their Position Weight Matrices for *Homo sapiens* from Jaspar (Mathelier, et al., 2016). I then calculated the fraction of weight at each position attributable to each base. At each position I considered a base contributing at least 5% of overall weight to be a possible match at that position. I then converted these possible base matches per position into degenerate IUPAC bases to form an estimated degenerate motif. The CEBPB (MAO466.2) calculated motif was VTKDYRHAAY, and the CTCF (MAO139.1) calculated motif was NNNMCDSNAGR DGDHRVNN.

### C.2. Parallelized searches increase speed as expected

Motif searches are independent, and therefore embarrassingly parallel, by contig and strand. This tool can take advantage of multiple processors for independent processing when they are available. For this test, I used the primary build of the GRCh38 human genome (Ensembl 91). I benchmarked the performance for multiple processor usage by searching both motifs in the human reference FASTA (sense and antisense) for ten iterations each of using 1-10 processors. I performed the benchmarks on a server with an Intel i7-3930k 3.20 GHz processor and 32 GB of RAM running Ubuntu 16.04.1 64-bit and Python 2.7.12. As expected, the single-processor runs were the slowest, and the runtime decreased noticeably with additional processors (**Fig. 1**). It is worth noting that the advantage of using multiple cores in this benchmark peaked at approximately 6 processors and stayed stable after that. The length and composition of the motifs is important, as demonstrated by different runtimes for each motif. Longer motifs, unsurprisingly, take longer to search compared to shorter motifs.

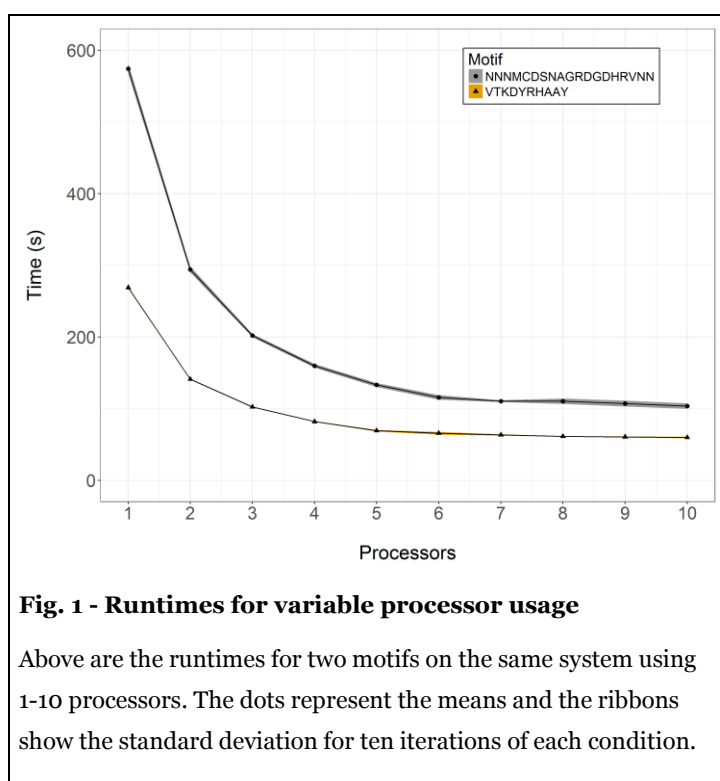

## D. Summary

The lack of portable, general-purpose motif-finding tools for uses such as genome annotation is a significant barrier for the discovery of motifs in new / non-model genomes. The rapid increase in the number of available whole-genomes only amplifies this problem. Motif scraper aims to fill this gap. This tool has cross-platform compatibility and a permissive license for broad reuse. The runtime for annotation of relatively degenerate nucleotide sequences is fast, on the order of minutes for a whole-genome using multiple processors. The

FASTA format allows for flexible input, ranging from whole genomes down cDNA sequences and plasmids. It could also be used to search for potential microRNA binding seed sequences in 3' UTRs to predict potential partners for organisms not available in TargetScan (Agarwal, et al., 2015).

It is worth noting that the performance of parallel processing is highest with few relatively large contigs, i.e. reference genomes. The algorithm can be applied to smaller contigs, such as 3' UTRs from a whole-genome to identify microRNA binding sites. However, the performance decreases appreciably with many short contigs. This limitation could be overcome by instead processing a batch of contigs per core to limit the number of data transfer operations. Overall, the broad operating system compatibility, use of a standard input format, and relative speed help support motif scraper as an important tool for non-model organisms and annotation of non-standard motifs.

## E. Acknowledgements

Special thanks to Dr. Karyn Meltz Steinberg for her helpful discussions during the development of this tool.

## F. Funding

This work was partially supported by the National Institutes of Health, National Institute of Arthritis and Musculoskeletal and Skin Diseases (P30-AR048335).

*Conflict of interest:* none declared.

## G. References

- Agarwal, V., et al. (2015) Predicting effective microRNA target sites in mammalian mRNAs, *Elife*, **4**, e05005.
- Andres-Leon, E., et al. (2015) miRGate: a curated database of human, mouse and rat miRNA-mRNA targets, *Database : the journal of biological databases and curation*, **2015**, bav035.
- Dweep, H., Gretz, N. and Sticht, C. (2014) miRWalk Database for miRNA-Target Interactions. In Alvarez, M.L. and Nourbakhsh, M. (eds), *RNA Mapping: Methods and Protocols*. Springer New York, New York, NY, pp. 289-305.
- Gratz, S.J., et al. (2014) Highly specific and efficient CRISPR/Cas9-catalyzed homology-directed repair in *Drosophila*, *Genetics*, **196**, 961-971.
- Griffiths-Jones, S. (2004) The microRNA Registry, *Nucleic Acids Res*, **32**, D109-111.
- Griffiths-Jones, S., et al. (2006) miRBase: microRNA sequences, targets and gene nomenclature, *Nucleic Acids Res*, **34**, D140-144.
- Griffiths-Jones, S., et al. (2008) miRBase: tools for microRNA genomics, *Nucleic Acids Res*, **36**, D154-158.
- Heigwer, F., Kerr, G. and Boutros, M. (2014) E-CRISP: fast CRISPR target site identification, *Nature methods*, **11**, 122-123.
- Kaplun, A., et al. (2016) Establishing and validating regulatory regions for variant annotation and expression analysis, *BMC Genomics*, **17 Suppl 2**, 393.
- Kel, A.E., et al. (2003) MATCH<sup>tm</sup>: a tool for searching transcription factor binding sites in DNA sequences, *Nucleic Acids Research*, **31**, 3576-3579.
- Knuppel, R., et al. (1994) TRANSFAC retrieval program: a network model database of eukaryotic transcription regulating sequences and proteins, *Journal of computational biology : a journal of computational molecular cell biology*, **1**, 191-198.
- Kozomara, A. and Griffiths-Jones, S. (2014) miRBase: annotating high confidence microRNAs using deep sequencing data, *Nucleic Acids Res*, **42**, D68-73.

- Lagana, A., *et al.* (2012) miR-EdiTar: a database of predicted A-to-I edited miRNA target sites, *Bioinformatics*, **28**, 3166-3168.
- Liu, H., *et al.* (2015) CRISPR-ERA: a comprehensive design tool for CRISPR-mediated gene editing, repression and activation, *Bioinformatics*, **31**, 3676-3678.
- Mathelier, A., *et al.* (2016) JASPAR 2016: a major expansion and update of the open-access database of transcription factor binding profiles, *Nucleic Acids Res*, **44**, D110-115.
- Matys, V., *et al.* (2006) TRANSFAC and its module TRANSCompel: transcriptional gene regulation in eukaryotes, *Nucleic Acids Res*, **34**, D108-110.
- Montague, T.G., *et al.* (2014) CHOPCHOP: a CRISPR/Cas9 and TALEN web tool for genome editing, *Nucleic Acids Res*, **42**, W401-407.
- Naito, Y., *et al.* (2015) CRISPRdirect: software for designing CRISPR/Cas guide RNA with reduced off-target sites, *Bioinformatics*, **31**, 1120-1123.
- Prabakar, A. and Natarajan, J. (2017) ImmunemiR - A Database of Prioritized Immune miRNA Disease Associations and its Interactome, *Microna*, **6**, 71-78.
- Roberson, E.D.O. (2015) Identification of high-efficiency 3'GG gRNA motifs in indexed FASTA files with ngg2, *PeerJ Comput Sci*, **1**, e33.
- Shirley, M.D., *et al.* (2015) Efficient "pythonic" access to FASTA files using pyfaidx. PeerJ PrePrints.
- Stemmer, M., *et al.* (2015) CCTop: An Intuitive, Flexible and Reliable CRISPR/Cas9 Target Prediction Tool, *PLoS One*, **10**, e0124633.
- Wingender, E. (1988) Compilation of transcription regulating proteins, *Nucleic Acids Res*, **16**, 1879-1902.
- Wingender, E. (2008) The TRANSFAC project as an example of framework technology that supports the analysis of genomic regulation, *Brief Bioinform*, **9**, 326-332.
- Wingender, E., *et al.* (1996) TRANSFAC: A database on transcription factors and their DNA binding sites, *Nucleic Acids Research*, **24**, 238-241.
- Xiao, A., *et al.* (2014) CasOT: a genome-wide Cas9/gRNA off-target searching tool, *Bioinformatics*, **30**, 1180-1182.
